# Supplementary material for: NDM-5-Producing Escherichia coli Co-Harboring mcr-1 Gene in Companion Animals in China
Source: MDPI journal article supplement (doi:10.3390/ani12101310), 2022-05-20
Supplement: s1 [file s1]

**Table S1.** MICs of sixteen antimicrobials agents against NDM-5-positive isolates and transconjugants.

| Strains                | MICs (mg/L) |      |      |     |     |     |        |     |     |     |       |     |        |     |      |       |
|------------------------|-------------|------|------|-----|-----|-----|--------|-----|-----|-----|-------|-----|--------|-----|------|-------|
|                        | CTX         | CAZ  | FOX  | MEM | ERT | IMP | ATM    | AMK | GEN | TOB | CIP   | TET | TGC    | FOS | SXT  | CS    |
| CQ02 6-1               | >256        | >256 | >256 | 16  | >64 | >64 | >256   | 2   | 64  | 8   | >256  | 256 | 1      | 128 | >320 | 4     |
| CQ02 6-3               | 256         | >256 | >256 | 64  | >64 | >64 | 32     | 4   | 16  | 64  | 256   | 128 | 0.5    | 4   | >320 | 0.25  |
| GZ03                   | 256         | >256 | >128 | 4   | 64  | 64  | 0.5    | 4   | 1   | 16  | 2     | 64  | 0.5    | 4   | >320 | 0.5   |
| GZ09                   | 256         | >256 | >128 | 4   | 32  | >64 | 0.25   | 2   | 1   | 8   | 2     | 64  | 0.5    | 2   | >320 | 0.5   |
| YZ-10                  | 128         | >256 | >256 | 16  | >64 | 32  | 4      | 2   | 0.5 | 0.5 | 32    | 8   | 0.5    | 8   | >320 | 0.5   |
| <i>Transconjugants</i> |             |      |      |     |     |     |        |     |     |     |       |     |        |     |      |       |
| CQ02 6-1T              | 128         | 128  | >128 | 4   | >64 | 32  | 0.5    | 2   | 2   | 2   | 0.03  | 2   | 0.5    | 1   | 10   | 4     |
| CQ02 6-3T              | 128         | 128  | 128  | 8   | 64  | 32  | 0.25   | 2   | 2   | 2   | 0.03  | 2   | 0.5    | 2   | 10   | 0.25  |
| GZ03T                  | 64          | 256  | >128 | 1   | 64  | 32  | 0.0625 | 2   | 2   | 1   | 0.008 | 1   | 0.015  | 2   | 10   | 0.125 |
| GZ09T                  | 64          | 256  | >128 | 1   | >64 | 64  | 0.125  | 2   | 2   | 1   | 0.015 | 1   | 0.0625 | 2   | 10   | 0.125 |
| YZ-10T                 | 256         | 128  | >128 | 16  | >64 | 16  | 0.25   | 2   | 2   | 2   | 0.03  | 1   | 0.0625 | 2   | 10   | 0.125 |

CTX, cefotaxime; CAZ, ceftazidime; FOX, cefoxitin; MEM, meropenem; ERT, ertapenem; IMP, imipenem; ATM, aztreonam; AMK, amikacin; GEN, gentamicin; TOB, tobramycin; CIP, ciprofloxacin; TET, tetracycline; TGC, tigecycline; FOS, fosfomycin; SXT, sulfamethoxazole–trimethoprim, CS, colistin.

**Table S2.** Primer sequences for carbapenem resistance genes.

| Target genes                 | Primers (5'-3')        | Length (bp) | Tm (°C) |
|------------------------------|------------------------|-------------|---------|
| <i>bla</i> <sub>NDM</sub>    | GGTTTGGCGATCTGGTTTTTC  | 621         | 56.1    |
|                              | CGGAATGGCTCATCACGATC   |             |         |
| <i>bla</i> <sub>KPC</sub>    | CGTCTAGTTCTGCTGTCTTG   | 798         | 58.2    |
|                              | CTTGTCATCCTTGTTAGGCG   |             |         |
| <i>bla</i> <sub>OXA-48</sub> | GCGTGGTTAAGGATGAACAC   | 438         | 57.7    |
|                              | CATCAAGTTCAACCCAACCG   |             |         |
| <i>bla</i> <sub>IMP</sub>    | GGAATAGAGTGGCTTAAYTCTC | 232         | 54.6    |
|                              | GGTTTAAYAAAACAACCACC   |             |         |
| <i>bla</i> <sub>VIM</sub>    | GATGGTGTTTGGTCGCATA    | 390         | 56.3    |
|                              | CGAATGCGCAGCACCAG      |             |         |
